# Supplementary material for: Beyond Trinucleotide Repeat Expansion in Fragile X Syndrome: Rare Coding and Noncoding Variants in FMR1 and Associated Phenotypes
Source: MDPI journal article supplement (doi:10.3390/genes12111669), 2021-10-22
Supplement: s1 [file s1]

**Supplementary Table 5.** All published noncoding small variants with details of information used to apply pathogenicity criteria.

| Ref.   | Location                                       |                                                     | #<br>affected<br>with<br>variant,<br>sex | CGG<br>repeat<br>s | Other testing<br>done, variants | Inheritance<br>in proband | Patient and/or functional data                                                                                    | ACMG<br>criteria | Conclusion |
|--------|------------------------------------------------|-----------------------------------------------------|------------------------------------------|--------------------|---------------------------------|---------------------------|-------------------------------------------------------------------------------------------------------------------|------------------|------------|
|        | DNA                                            | r./p.                                               |                                          |                    |                                 |                           |                                                                                                                   |                  |            |
| [1]    | g.147909332G>A                                 | N/A (2.5 kb upstream of<br>r.1, loss of EcoRI site) | 1F                                       | 23, 32             |                                 | Paternal<br>(unaffected)  | (1 het in gnomAD)                                                                                                 | BS2              | VUS        |
| [2] #2 | g.147911760_2dup(<br>GGC) (promoter ~-<br>154) |                                                     | 1M                                       | 31                 | FMR1 only                       |                           | Absent in unaffected sister<br>Normal FMRP (lymphocytes), normal gel<br>shift and reporter assays <i>in vitro</i> |                  |            |
| [3]    | g.147911760_2dup(<br>GGC) (promoter ~-<br>154) |                                                     | 8<br>samples<br>(male<br>DD<br>cohort)   | nl                 | FMR1 only                       |                           | (gnomAD AF 2.5% with many hemizygotes,<br>rs200904100)                                                            | BS1 BS2 BS3      | BEN        |
| [4]    | g.147911767C>G<br>(promoter ~-149)             |                                                     | 1M                                       | 31                 | FMR1 only                       |                           | Present in unaffected MGF (and mother,<br>mat aunt, and sister)                                                   | BS2 BS3          | BEN        |
| [2] #1 | g.147911767C>G<br>(promoter ~-149)             |                                                     | 1M                                       | 29                 | AFF2 repeats<br>and FMR1        |                           | Normal gel shift and gene reporter assays                                                                         |                  |            |
| [3]    | "c.-332G>C"<br>(promoter)                      |                                                     | 1M<br>(male<br>DD<br>cohort)             | nl                 | FMR1 only                       |                           | Reduced reporter expression to 5.9% of WT<br>(10 hemizygotes in gnomAD, rs922007219)                              | BS1 BS2 PS3      | VUS        |
| [3]    | "c.-293T>C"<br>(promoter)                      |                                                     | 1M<br>(male<br>DD<br>cohort)             | nl                 | FMR1 only                       |                           | Reduced reporter expression to 29.2% of WT<br>(7 hemizygotes in gnomAD, rs1222840333)                             | BS1 BS2 PS3      | VUS        |
| [3]    | c.-254A>G                                      |                                                     | 1M<br>(male<br>DD<br>cohort)             | nl                 | FMR1 only                       |                           | Reduced reporter expression to 36.2% of WT<br>(8 hemizygotes in gnomAD, rs1217601043)                             | BS1 BS2 PS3      | VUS        |
| [5]    | CGG repeat 8<br>CGG>CCG (c.-<br>107G>C)        | N/A (new EagI site)                                 | N/A<br>(healthy<br>female,<br>FHx ID)    | nl                 | FMR1 repeat<br>region only      |                           | Present in 2 unaffected males, opposite side<br>of family from members with ID                                    | BS2 BS4          | BEN        |

|      |                                |                                                                                                    |                                    |    |                                             |                                        |                                                                                                                                           |                 |      |
|------|--------------------------------|----------------------------------------------------------------------------------------------------|------------------------------------|----|---------------------------------------------|----------------------------------------|-------------------------------------------------------------------------------------------------------------------------------------------|-----------------|------|
| [6]  | CGG repeat 26 of 31<br>CGG>CCG | N/A (new EagI site)                                                                                | 1M                                 | 31 | FMR1 partial<br>sequencing<br>only          | Maternal<br>(unaffected)               | Normal % of FMRP+ lymphocytes, but<br>statistically significant decrease to 76%<br>normal FMRP level in lymphoblastoid cell<br>line       | None            | VUS  |
| [7]  | c.-4_+1delGAAGA                | p.(M1=), no start loss<br>because c.-9_-5 is also<br>GAAGA (amplification<br>failure in PCR assay) | 1M                                 | nl | FMR1 only                                   | Maternal<br>(98% FMRP+<br>lymphocytes) | Normal FMRP level in lymphoblastoid cell<br>line; 80% lymphocytes FMRP+                                                                   | BS3             | VUS  |
| [8]  | c.18G>T                        | p.(V6=)                                                                                            | 2M<br>(unrelated)                  | nl | FMR1 only                                   | Maternal<br>(unaffected<br>in 1)       | Normal intron 1 splicing in lymphoblastoid<br>cell line (1 patient), normal FMRP Western<br>blot in lymphoblastoid cell line (1 patient)  |                 |      |
| [9]  | c.18G>T                        | p.(V6=)                                                                                            | 4/508<br>male<br>ID/DD<br>cohort   |    |                                             |                                        |                                                                                                                                           | BS1 BS2 BS3     | BEN  |
| [3]  | c.18G>T                        | p.(V6=)                                                                                            | 13<br>samples,<br>19<br>controls   |    |                                             |                                        | Observed in multiple unaffected controls                                                                                                  |                 |      |
| [8]  | c.51+88_89del                  | (intron 1)                                                                                         | 1M<br>(clinical<br>FXS<br>testing) | nl | FMR1 only                                   |                                        | Absent in affected brother                                                                                                                | BS4             | VUS  |
| [10] | c.51+423G>C                    | (New BssHI site on<br>Southern)                                                                    | 1M                                 | 42 | FMR1 partial<br>sequencing                  |                                        |                                                                                                                                           |                 | VUS  |
| [11] | c.51+730A>G                    | (New EcoRI site on<br>Southern)                                                                    | 1M<br>(clinical<br>lab<br>testing) | nl | FMR1 only                                   | Maternal<br>(unaffected)               | Present in 1 brother, ? phenotype                                                                                                         |                 | VUS  |
| [12] | c.52-47A>G                     |                                                                                                    | 1M (ID,<br>2 FXS<br>features)      |    | FMR1<br>sequencing-<br>by-<br>hybridization |                                        | (221 hemizygotes in gnomAD, rs80358323)                                                                                                   | BS1 BS2         | BEN  |
| [13] | c.52-1_52delinsTA              | 2 abnormal transcripts                                                                             | 1M +<br>mother                     | nl | FMR1 partial<br>sequencing                  | Maternal<br>(affected)                 | No normal transcripts; 2 abnormal<br>transcripts with skipped exon 2 and skipped<br>exons 2-3; FMRP absent in lymphoblastoid<br>cell line | PVS1 PS3<br>PP1 | PATH |

|         |                   |                                                  |                                     |    |                                              |                                                                                                                                                                                                    |             |       |
|---------|-------------------|--------------------------------------------------|-------------------------------------|----|----------------------------------------------|----------------------------------------------------------------------------------------------------------------------------------------------------------------------------------------------------|-------------|-------|
| [12]    | c.105-179G>T      |                                                  | 1M (ID, 2 FXS features)             |    | FMR1 sequencing-by-hybridization             | (305 hemizygotes in gnomAD, rs80358324)                                                                                                                                                            | BS1 BS2     | BEN   |
| [3]     | c.105-8A>C        |                                                  | 6/963 samples (male DD cohort)      | nl | FMR1 only                                    | (103 hemizygotes in gnomAD, rs183745963)                                                                                                                                                           | BS1 BS2     | BEN   |
| [14] #3 | c.420-8A>G        | r.419_420ins420-7_420-1 (p.(M140Ifs*3))          | 1M (ID cohort)                      | nl | 451-gene ID exon panel                       | Maternal (unaffected, no XCI skewing)<br>Cryptic splice acceptor leading to retention of 7 nt from intron 5 (blood)                                                                                | PS3 PM2     | LPATH |
| [15]    | c.513+27T>C       | No change found (intron 6)                       | 1 sample (ID, 1 FXS feature cohort) | nl | FMR1 only                                    | No change in exon 6-7 junction on RT-PCR product sequencing                                                                                                                                        | BS3         | VUS   |
| [3]     | c.630+438A>C      |                                                  | 1M (DD cohort)                      | nl | FMR1 only                                    |                                                                                                                                                                                                    |             | VUS   |
| [3]     | c.631-840G>A      |                                                  | 1M (DD cohort)                      | nl | FMR1 only                                    |                                                                                                                                                                                                    |             | VUS   |
| [16,17] | c.801G>A (IVS8-1) | r.631_801del (p.(S211_G267del)); exon 8 skipping | 1M (ID cohort)                      |    | 56-gene ID panel                             | De novo with maternity/paternity confirmed<br>No FHx DD (parental first cousin consanguinity)<br>Exon 8 skipping with no normal RT-PCR product; rat model with deletion of exon 8 is affected      | PS2 PS3 PM2 | PATH  |
| [18]    | c.879A>C (IVS9-2) | p.(V293=); reported abnormal splicing intron 9   | 1F (autism/ID cohort)               | nl | FMR1 partial (SSCP with subclone sequencing) | Inclusion of intron 9 sequence in 23/36 subclones from peripheral blood cDNA                                                                                                                       |             |       |
| [15]    | c.879A>C (IVS9-2) | p.(V293=); no splicing abnormality found         | 1M (ID, 1 FXS feature)              | nl | FMR1 only                                    | Maternal (unaffected)<br>No abnormal splice amplicons found; normal exon 9-10 junction in RT-PCR product sequence in blood; FMRP present in blood homogenate (1 hemizygote in gnomAD, rs782013865) | BS2         | VUS   |
| [3]     | c.880+885A>G      |                                                  | 1M (DD cohort)                      | nl | FMR1 only                                    | (24 hemizygotes in gnomAD, rs781933453)                                                                                                                                                            | BS1 BS2     | BEN   |

|      |              |                                                        |                                                           |    |                                                                               |                                                 |                                                                                                                                                                                                                                                                  |                     |       |
|------|--------------|--------------------------------------------------------|-----------------------------------------------------------|----|-------------------------------------------------------------------------------|-------------------------------------------------|------------------------------------------------------------------------------------------------------------------------------------------------------------------------------------------------------------------------------------------------------------------|---------------------|-------|
| [19] | c.881-1G>T   | ? (exon 10 splice acceptor)                            | 1M<br>(clinical<br>suspicion)                             |    | Genome<br>sequencing                                                          | Maternal<br>(1:99 skewed<br>XCI,<br>unaffected) |                                                                                                                                                                                                                                                                  | PVS1 PM2            | LPATH |
| [14] | c.990+1G>A   | r.881_990del<br>(p.(K295Nfs*11)) (exon 10<br>skipping) | 1M (ID<br>cohort)                                         | nl | 451-gene ID<br>exon panel                                                     | De novo                                         | Exon 10 skipping in blood                                                                                                                                                                                                                                        | PVS1 PS3<br>PM2 PM6 | PATH  |
| [3]  | c.990+4T>C   | ? (intron 10)                                          | 1M (DD<br>cohort)                                         | nl | FMR1 only                                                                     |                                                 |                                                                                                                                                                                                                                                                  | PM2                 | VUS   |
| [20] | c.990+14C>T  | r.881_990del<br>(p.(K295Nfs*11)) (exon 10<br>skipping) | 3<br>unrelated<br>males<br>(ID, FXS<br>feature<br>cohort) | nl | SSCP exons 1-<br>10 and 15 with<br>sequencing;<br>c.1637G>A in<br>one patient |                                                 | Exon 10 skipping on peripheral blood RT-<br>PCR product sequencing in 2 probands (TN-<br>183, TN-351)                                                                                                                                                            |                     |       |
| [21] | c.990+14C>T  |                                                        | 81<br>control<br>individuals                              |    |                                                                               |                                                 | Observed in many controls from general<br>population                                                                                                                                                                                                             |                     |       |
| [9]  | c.990+14C>T  |                                                        | 45/508 in<br>ID/DD<br>cohort                              |    |                                                                               |                                                 |                                                                                                                                                                                                                                                                  | BA1 BS2             | BEN   |
| [22] | c.990+14C>T  |                                                        | 7M/4F<br>among<br>88<br>patients<br>with<br>ASD           |    |                                                                               |                                                 | Statistically significant (p=0.0123) higher<br>frequency in ASD patients vs controls<br>Stably inherited in unaffected family<br>members                                                                                                                         |                     |       |
| [23] | c.990+14C>T  |                                                        |                                                           |    |                                                                               |                                                 | No significant transmission disequilibrium<br>(p=0.26)<br>Allele frequency 65% (22/34) in East Asian<br>controls; concluded that previously<br>observed association with ASD was false<br>positive due to population stratification<br>(gnomAD AF >10%, rs25714) |                     |       |
| [9]  | c.1189-39A>G |                                                        | 1M<br>(ID/DD<br>cohort)                                   |    | FMR1 melting<br>and                                                           |                                                 | (2 hemizygotes in gnomAD, rs781962133)                                                                                                                                                                                                                           | BS2                 | VUS   |

|           |                |                                              | sequencing only |                                  |                                                                                                                                                                                                                                                                                                                                  |                 |     |  |
|-----------|----------------|----------------------------------------------|-----------------|----------------------------------|----------------------------------------------------------------------------------------------------------------------------------------------------------------------------------------------------------------------------------------------------------------------------------------------------------------------------------|-----------------|-----|--|
| [3]       | c.1472-521C>G  | 1M (DD cohort)                               |                 | FMR1 only                        | (1 hemizygote in gnomAD, rs1557181482)                                                                                                                                                                                                                                                                                           | BS2             | VUS |  |
| [3]       | c.*23T>C       | 1M (DD cohort)                               |                 | FMR1 only                        |                                                                                                                                                                                                                                                                                                                                  |                 | VUS |  |
| [9]       | c.*60G>C       | 1M (ID/DD cohort)                            |                 | FMR1 melting and sequencing only | (46 hemizygotes in gnomAD, rs782402226)                                                                                                                                                                                                                                                                                          | BS1 BS2         | BEN |  |
| [9]       | c.*68T>C       | 1M (ID/DD cohort)                            |                 | FMR1 melting and sequencing only | (2 hemizygotes in gnomAD, rs781983693)                                                                                                                                                                                                                                                                                           | BS2             | VUS |  |
| [15]      | c.*312_313dupT | 1 (ID, 1 FXS feature cohort)                 | nl              | FMR1 only                        |                                                                                                                                                                                                                                                                                                                                  | PM2             | VUS |  |
| [24], [3] | c.*746T>C      | 2M (proband and half-brother from DD cohort) | nl              | FMR1 only                        | Faster mRNA decay with FMRP level 80% of normal in lymphoblastoid cell line; variant sufficient and necessary to decrease reporter gene expression <i>in vitro</i> ; loss of metabotropic glutamate receptor-stimulated upregulation of reporter expression in transfected mouse neurons (72 hemizygotes in gnomAD, rs183130936) | PS3 PP1 BS1 BS2 | VUS |  |
| [15]      | c.*760C>A      | 1 (ID, 1 FXS feature cohort)                 | nl              | FMR1 only                        | (1 hemizygote in gnomAD, rs184987604)                                                                                                                                                                                                                                                                                            | BS2             | VUS |  |
| [3]       | c.*1867G>A     | 12/963 samples (DD cohort)                   | nl              | FMR1 only                        | (466 hemizygotes in gnomAD, rs148216485)                                                                                                                                                                                                                                                                                         | BS1 BS2         | BEN |  |
| [3]       | c.*2035C>T     | 3/963 samples (DD cohort)                    | nl              | FMR1 only                        | (39 hemizygotes in gnomAD, rs140123351)                                                                                                                                                                                                                                                                                          | BS1 BS2         | BEN |  |

1. Liang, S.; Bass, H.N.; Gao, H.; Astbury, C.; Jamehdor, M.R.; Qu, Y. A pseudo-full mutation identified in fragile X assay reveals a novel base change abolishing an EcoRI restriction site. *J Mol Diagn* **2008**, *10*, 469-474, doi:10.2353/jmoldx.2008.080059.
2. Milà, M.; Castellví-Bel, S.; Sánchez, A.; Barceló, A.; Badenas, C.; Mallolas, J.; Estivill, X. Rare variants in the promoter of the fragile X syndrome gene (FMR1). *Mol Cell Probes* **2000**, *14*, 115-119, doi:10.1006/mcpr.2000.0293.
3. Collins, S.C.; Bray, S.M.; Suhl, J.A.; Cutler, D.J.; Coffee, B.; Zwick, M.E.; Warren, S.T. Identification of novel FMR1 variants by massively parallel sequencing in developmentally delayed males. *Am J Med Genet A* **2010**, *152a*, 2512-2520, doi:10.1002/ajmg.a.33626.
4. Grasso, M.; Cecconi, M.; Boni, S.; Forzano, F.; Barbaresi, M.; Memo, L.; Perroni, L.; Faravelli, F.; Di Maria, E. The -413C > G substitution in the promoter of the FMR1 gene is not associated with the fragile X syndrome phenotype. *Mol Cell Probes* **2010**, *24*, 107-109, doi:10.1016/j.mcp.2009.10.006.
5. Cecconi, M.; Forzano, F.; Rinaldi, R.; Cappellacci, S.; Grammatico, P.; Faravelli, F.; Dagna Bricarelli, F.; Di Maria, E.; Grasso, M. A single nucleotide variant in the FMR1 CGG repeat results in a "Pseudodeletion" and is not associated with the fragile X syndrome phenotype. *J Mol Diagn* **2008**, *10*, 272-275, doi:10.2353/jmoldx.2008.070163.
6. Tarleton, J.; Kenneson, A.; Taylor, A.K.; Crandall, K.; Fletcher, R.; Casey, R.; Hart, P.S.; Hatton, D.; Fisch, G.; Warren, S.T. A single base alteration in the CGG repeat region of FMR1: possible effects on gene expression and phenotype. *J Med Genet* **2002**, *39*, 196-200, doi:10.1136/jmg.39.3.196.
7. Hegde, M.R.; Chong, B.; Fawkner, M.; Lambiris, N.; Peters, H.; Kenneson, A.; Warren, S.T.; Love, D.R.; McGaughan, J. Microdeletion in the FMR-1 gene: an apparent null allele using routine clinical PCR amplification. *J Med Genet* **2001**, *38*, 624-629, doi:10.1136/jmg.38.9.624.
8. Grønskov, K.; Hallberg, A.; Brøndum-Nielsen, K. Mutational analysis of the FMR1 gene in 118 mentally retarded males suspected of fragile X syndrome: absence of prevalent mutations. *Hum Genet* **1998**, *102*, 440-445, doi:10.1007/s004390050718.
9. Handt, M.; Epplen, A.; Hoffjan, S.; Mese, K.; Epplen, J.T.; Dekomien, G. Point mutation frequency in the FMR1 gene as revealed by fragile X syndrome screening. *Mol Cell Probes* **2014**, *28*, 279-283, doi:10.1016/j.mcp.2014.08.003.
10. Thyagarajan, B.; Bower, M.; Berger, M.; Jones, S.; Dolan, M.; Wang, X. A novel polymorphism in the FMR1 gene: implications for clinical testing of fragile X syndrome. *Arch Pathol Lab Med* **2008**, *132*, 95-98, doi:10.5858/2008-132-95-anpittf.
11. Daly, T.M.; Rafii, A.; Martin, R.A.; Zehnbauser, B.A. Novel polymorphism in the FMR1 gene resulting in a "pseudodeletion" of FMR1 in a commonly used fragile X assay. *J Mol Diagn* **2000**, *2*, 128-131, doi:10.1016/s1525-1578(10)60627-7.

12. Collins, S.C.; Coffee, B.; Benke, P.J.; Berry-Kravis, E.; Gilbert, F.; Oostra, B.; Halley, D.; Zwick, M.E.; Cutler, D.J.; Warren, S.T. Array-based FMR1 sequencing and deletion analysis in patients with a fragile X syndrome-like phenotype. *PLoS One* **2010**, *5*, e9476, doi:10.1371/journal.pone.0009476.
13. Lugenbeel, K.A.; Peier, A.M.; Carson, N.L.; Chudley, A.E.; Nelson, D.L. Intragenic loss of function mutations demonstrate the primary role of FMR1 in fragile X syndrome. *Nat Genet* **1995**, *10*, 483-485, doi:10.1038/ng0895-483.
14. Quartier, A.; Poquet, H.; Gilbert-Dussardier, B.; Rossi, M.; Casteleyn, A.S.; Portes, V.D.; Feger, C.; Nourisson, E.; Kuentz, P.; Redin, C.; et al. Intragenic FMR1 disease-causing variants: a significant mutational mechanism leading to Fragile-X syndrome. *Eur J Hum Genet* **2017**, *25*, 423-431, doi:10.1038/ejhg.2016.204.
15. Luo, S.; Huang, W.; Xia, Q.; Du, Q.; Wu, L.; Duan, R. Mutational analyses of the FMR1 gene in Chinese pediatric population of fragile x suspects: low tolerance for point mutation. *J Child Neurol* **2015**, *30*, 803-806, doi:10.1177/0883073814538508.
16. Golden, C.E.M.; Breen, M.S.; Koro, L.; Sonar, S.; Niblo, K.; Browne, A.; Burlant, N.; Di Marino, D.; De Rubeis, S.; Baxter, M.G.; et al. Deletion of the KH1 Domain of Fmr1 Leads to Transcriptional Alterations and Attentional Deficits in Rats. *Cereb Cortex* **2019**, *29*, 2228-2244, doi:10.1093/cercor/bhz029.
17. Carion, N.; Briand, A.; Cuisset, L.; Pacot, L.; Afenjar, A.; Bienvenu, T. Loss of the KH1 domain of FMR1 in humans due to a synonymous variant causes global developmental retardation. *Gene* **2020**, *753*, 144793, doi:10.1016/j.gene.2020.144793.
18. Shinahara, K.; Saijo, T.; Mori, K.; Kuroda, Y. Single-strand conformation polymorphism analysis of the FMR1 gene in autistic and mentally retarded children in Japan. *J Med Invest* **2004**, *51*, 52-58, doi:10.2152/jmi.51.52.
19. Carroll, R.; Shaw, M.; Arvio, M.; Gardner, A.; Kumar, R.; Hodgson, B.; Heron, S.; McKenzie, F.; Järvelä, I.; Gecz, J. Two novel intragenic variants in the FMR1 gene in patients with suspect clinical diagnosis of Fragile X syndrome and no CGG repeat expansion. *Eur J Med Genet* **2020**, *63*, 104010, doi:10.1016/j.ejmg.2020.104010.
20. Wang, Y.C.; Lin, M.L.; Lin, S.J.; Li, Y.C.; Li, S.Y. Novel point mutation within intron 10 of FMR-1 gene causing fragile X syndrome. *Hum Mutat* **1997**, *10*, 393-399, doi:10.1002/(sici)1098-1004(1997)10:5<393::Aid-humu10>3.0.Co;2-v.
21. Vincent, J.B.; Gurling, H.M. Point mutation in intron 10 of FMR1 is unlikely to be a cause of fragile X syndrome. *Hum Mutat* **1998**, *12*, 431-432, doi:10.1002/(sici)1098-1004(1998)12:6<431::Aid-humu10>3.0.Co;2-y.
22. Vincent, J.B.; Konecki, D.S.; Munstermann, E.; Bolton, P.; Poustka, A.; Poustka, F.; Gurling, H.M. Point mutation analysis of the FMR-1 gene in autism. *Mol Psychiatry* **1996**, *1*, 227-231.
23. Vincent, J.B.; Thevarkunnel, S.; Kolozsvari, D.; Paterson, A.D.; Roberts, W.; Scherer, S.W. Association and transmission analysis of the FMR1 IVS10 + 14C-T variant in autism. *Am J Med Genet B Neuropsychiatr Genet* **2004**, *125b*, 54-56, doi:10.1002/ajmg.b.20088.

24. Suhl, J.A.; Muddashetty, R.S.; Anderson, B.R.; Ifrim, M.F.; Visootsak, J.; Bassell, G.J.; Warren, S.T. A 3' untranslated region variant in FMR1 eliminates neuronal activity-dependent translation of FMRP by disrupting binding of the RNA-binding protein HuR. *Proc Natl Acad Sci U S A* **2015**, *112*, E6553-6561, doi:10.1073/pnas.1514260112.
