# Supplementary material for: Beyond Trinucleotide Repeat Expansion in Fragile X Syndrome: Rare Coding and Noncoding Variants in FMR1 and Associated Phenotypes
Source: MDPI journal article supplement (doi:10.3390/genes12111669), 2021-10-22
Supplement: s1 [file s1]

**Supplementary Table S3.** All published coding region small variants with details of information used to apply pathogenicity criteria.

| Ref.                  | Location               |                | # affected with variant, sex | CGG repeats | Other variants in pt.                                         | Inheritance in proband                           | Segregation                                            | Patient and/or functional data                                                                                            | ACMG criteria [1]                                            | Conclusion |
|-----------------------|------------------------|----------------|------------------------------|-------------|---------------------------------------------------------------|--------------------------------------------------|--------------------------------------------------------|---------------------------------------------------------------------------------------------------------------------------|--------------------------------------------------------------|------------|
|                       | c.                     | p.             |                              |             |                                                               |                                                  |                                                        |                                                                                                                           |                                                              |            |
| [2]                   | c.80C>A                | p.S27*         | 1M, 1F                       | 29          |                                                               | Mat (affected)                                   |                                                        | FMRP absent                                                                                                               | PVS1 PS3 PM2 PP1                                             | PATH       |
| [3]                   | c.188_193del           | p.(D63_E64del) | 1M                           | nl          |                                                               | De novo confirmed                                |                                                        |                                                                                                                           | PS2 PM2 PM4 PP3                                              | LPATH      |
| [4]                   | c.229delT              | p.(C77Afs*5)   | 1M                           | nl          | Maternal PATH 308 kb del involving <i>PTCHD1-AS</i> (autism)  | De novo confirmed                                |                                                        |                                                                                                                           | PVS1 PS2 PM2 BP5                                             | PATH       |
| [5] #1                | c.373delA <sup>a</sup> | p.(T125Lfs*35) | 1M                           | nl          |                                                               | De novo                                          |                                                        | mRNA + (RT-PCR), FMRP absent (lymphoblastoid cell line)                                                                   | PVS1 PS3 PM6                                                 | PATH       |
| [6], [7] <sup>b</sup> | c.377T>C               | p.(F126S)      | 1M                           |             | <i>KDM5C</i> I1349M (maternal), <i>ALG13</i> H771R (maternal) | De novo                                          |                                                        |                                                                                                                           | PS2 PM6 PP3                                                  | LPATH      |
| [8], [9]              | c.413G>A               | p.R138Q        | 1M, 1F                       | nl          |                                                               | Maternal (affected, learning disability/anxiety) | MGF and father (not tested) also had learning problems | AMPA signaling and RNA binding unchanged (transduced mouse neurons); deficient presynaptic function ( <i>Drosophila</i> ) | PS3 PP1 PP4; 7 hemizygotes in gnomAD v3 exomes (rs200163413) | LPATH      |
| [10]                  | c.413G>A               | p.R138Q        | 1M                           | 24          | (1st cousin consanguinity)                                    | Maternal                                         | Present in sister (no details)                         | Classic FXS presentation                                                                                                  |                                                              |            |
| [11]                  | c.413G>A               | p.R138Q        | N/A                          |             |                                                               |                                                  |                                                        | ID/ASD-like features (knock-in mouse model)                                                                               |                                                              |            |
| [12]                  | c.413G>A               | p.R138Q        | 1F                           | 29, 37      |                                                               | Absent in mother; healthy father not tested      |                                                        |                                                                                                                           |                                                              |            |
| [13,14]               | c.677G>A               | p.(R226K)      | 1M                           |             | 7 variants, no diagnosis                                      |                                                  |                                                        |                                                                                                                           | PM2 PP3                                                      | VUS        |
| [13]                  | c.767A>G               | p.(D256G)      | 1M                           |             | 5 variants, no diagnosis                                      |                                                  |                                                        |                                                                                                                           | PM2 PP3                                                      | VUS        |

|            |                          |                |                          |    |                                                        |                                        |                                                               |                                                                                                                                                                       |                 |       |
|------------|--------------------------|----------------|--------------------------|----|--------------------------------------------------------|----------------------------------------|---------------------------------------------------------------|-----------------------------------------------------------------------------------------------------------------------------------------------------------------------|-----------------|-------|
| [15]       | c.797G>A                 | p.(G266E)      | 1M                       | 23 |                                                        | Maternal (unaffected)                  | Absent in 3 unaffected brothers                               | Deficient RNA binding, AMPA trafficking (transduced mouse neurons)                                                                                                    | PS3 PM2 PP3     | LPATH |
| [16], [17] | c.911T>A                 | p.(I304N)      | 1M                       | nl | Known PHKA2 deficiency (glycogen storage disease IXa1) | De novo confirmed                      |                                                               | mRNA present (RT-PCR), deficient association with polyribosomes (lymphoblastoid cell line)                                                                            | PS2 PS3 PM2 PP3 | PATH  |
| [18] #1    | c.1021-1028delinsT ATTGG | p.N341Yfs*7    | 2M                       | nl |                                                        | Mother not tested; had epilepsy        | Present in unaffected sister, absent in 2 unaffected brothers | mRNA +, FMRP absent (lymphoblastoid cell line)                                                                                                                        | PVS1 PS3 PP1    | PATH  |
| [19]       | c.1325G>A                | p.(R442Q)      | 2M + mother, grandmother |    | 11 kb paternal deletion of part of <i>MYH7</i>         | Maternal (affected)                    | Present in 2 affected brothers and mildly affected mother     | FMRP nl in hair roots (4 family members); abnormal protein localization (transfected HEK cells)                                                                       | PS3 PM2 PP1 PP3 | LPATH |
| [20]       | c.1444G>A                | p.(G482S)      | 1M                       |    |                                                        |                                        |                                                               |                                                                                                                                                                       | PM2 BP4         | VUS   |
| [21]       | c.1550C>T <sup>c</sup>   | p.(P517L)      | 1M                       | 36 |                                                        | ?                                      |                                                               |                                                                                                                                                                       | PM2             | VUS   |
| [20]       | c.1601G>A                | p.(R534H)      | 2M (unrelated), 1F       |    |                                                        | Maternal (unaffected) in both families |                                                               |                                                                                                                                                                       | PM2             | VUS   |
| [22]       | c.1610dup                | p.(G538Rfs*24) | 1M                       | 41 |                                                        | ?                                      |                                                               | mRNA 60% decreased and FMRP >90% decreased (lymphocyte cell line)<br>Truncated protein abnormal localization and function (transfected HEK cells, <i>Drosophila</i> ) | PVS1 PS3 PM2    | PATH  |
| [23]       | c.1618G>A                | p.(G540E)      | 1M                       | nl |                                                        |                                        |                                                               |                                                                                                                                                                       | PM2 PP3         | VUS   |
| [24] TN351 | c.1637G>A                | p.(R546H)      | 1M                       | nl | <i>FMR1</i> c.990+14C>T (see Table 4)                  | ?                                      |                                                               |                                                                                                                                                                       | PM2             | VUS   |

<sup>a</sup> New BglIII restriction site.

<sup>b</sup> All references in literature are to a variant identified in the DDD study that was not listed in that publication but corresponds to DECIPHER patient #259197.

<sup>c</sup> Reported as NM\_001185081.1:c.1216C>T (p.(Q406\*)) on an alternate reading frame from the reference transcript.

1. Richards, S.; Aziz, N.; Bale, S.; Bick, D.; Das, S.; Gastier-Foster, J.; Grody, W.W.; Hegde, M.; Lyon, E.; Spector, E.; et al. Standards and guidelines for the interpretation of sequence variants: a joint consensus recommendation of the American College of Medical Genetics and Genomics and the Association for Molecular Pathology. *Genet Med* **2015**, *17*, 405-424, doi:10.1038/gim.2015.30.
2. Grønskov, K.; Brøndum-Nielsen, K.; Dedic, A.; Hjalgrim, H. A nonsense mutation in FMR1 causing fragile X syndrome. *Eur J Hum Genet* **2011**, *19*, 489-491, doi:10.1038/ejhg.2010.223.
3. Maddirevula, S.; Alsaif, H.S.; Ibrahim, N.; Alkuraya, F.S. A de novo mutation in FMR1 in a patient with intellectual disability. *Eur J Med Genet* **2020**, *63*, 103763, doi:10.1016/j.ejmg.2019.103763.
4. Saldarriaga, W.; Payán-Gómez, C.; González-Teshima, L.Y.; Rosa, L.; Tassone, F.; Hagerman, R.J. Double Genetic Hit: Fragile X Syndrome and Partial Deletion of Protein Patched Homolog 1 Antisense as Cause of Severe Autism Spectrum Disorder. *J Dev Behav Pediatr* **2020**, *41*, 724-728, doi:10.1097/dbp.0000000000000850.
5. Lugenbeel, K.A.; Peier, A.M.; Carson, N.L.; Chudley, A.E.; Nelson, D.L. Intragenic loss of function mutations demonstrate the primary role of FMR1 in fragile X syndrome. *Nat Genet* **1995**, *10*, 483-485, doi:10.1038/ng0895-483.
6. Wright, C.F.; Fitzgerald, T.W.; Jones, W.D.; Clayton, S.; McRae, J.F.; van Kogelenberg, M.; King, D.A.; Ambridge, K.; Barrett, D.M.; Bayzetinova, T.; et al. Genetic diagnosis of developmental disorders in the DDD study: a scalable analysis of genome-wide research data. *Lancet* **2015**, *385*, 1305-1314, doi:10.1016/S0140-6736(14)61705-0.
7. Quartier, A.; Poquet, H.; Gilbert-Dussardier, B.; Rossi, M.; Casteleyn, A.S.; Portes, V.D.; Feger, C.; Nourisson, E.; Kuentz, P.; Redin, C.; et al. Intragenic FMR1 disease-causing variants: a significant mutational mechanism leading to Fragile-X syndrome. *Eur J Hum Genet* **2017**, *25*, 423-431, doi:10.1038/ejhg.2016.204.
8. Collins, S.C.; Bray, S.M.; Suhl, J.A.; Cutler, D.J.; Coffee, B.; Zwick, M.E.; Warren, S.T. Identification of novel FMR1 variants by massively parallel sequencing in developmentally delayed males. *Am J Med Genet A* **2010**, *152a*, 2512-2520, doi:10.1002/ajmg.a.33626.
9. Myrick, L.K.; Deng, P.Y.; Hashimoto, H.; Oh, Y.M.; Cho, Y.; Poidevin, M.J.; Suhl, J.A.; Visootsak, J.; Cavalli, V.; Jin, P.; et al. Independent role for presynaptic FMRP revealed by an FMR1 missense mutation associated with intellectual disability and seizures. *Proc Natl Acad Sci U S A* **2015**, *112*, 949-956, doi:10.1073/pnas.1423094112.
10. Sitzmann, A.F.; Hagelstrom, R.T.; Tassone, F.; Hagerman, R.J.; Butler, M.G. Rare FMR1 gene mutations causing fragile X syndrome: A review. *Am J Med Genet A* **2018**, *176*, 11-18, doi:10.1002/ajmg.a.38504.

11. Prieto, M.; Folci, A.; Poupon, G.; Schiavi, S.; Buzzelli, V.; Pronot, M.; François, U.; Pousinha, P.; Lattuada, N.; Abelanet, S.; et al. Missense mutation of Fmr1 results in impaired AMPAR-mediated plasticity and socio-cognitive deficits in mice. *Nat Commun* **2021**, *12*, 1557, doi:10.1038/s41467-021-21820-1.
12. Diaz, J.; Scheiner, C.; Leon, E. Presentation of a recurrent FMR1 missense mutation (R138Q) in an affected female. *Translational Science of Rare Diseases* **2018**, *3*, 139-144, doi:10.3233/TRD-180028.
13. Grozeva, D.; Carss, K.; Spasic-Boskovic, O.; Tejada, M.I.; Gecz, J.; Shaw, M.; Corbett, M.; Haan, E.; Thompson, E.; Friend, K.; et al. Targeted Next-Generation Sequencing Analysis of 1,000 Individuals with Intellectual Disability. *Hum Mutat* **2015**, *36*, 1197-1204, doi:10.1002/humu.22901.
14. Carion, N.; Briand, A.; Cuisset, L.; Pacot, L.; Afenjar, A.; Bienvenu, T. Loss of the KH1 domain of FMR1 in humans due to a synonymous variant causes global developmental retardation. *Gene* **2020**, *753*, 144793, doi:10.1016/j.gene.2020.144793.
15. Myrick, L.K.; Nakamoto-Kinoshita, M.; Lindor, N.M.; Kirmani, S.; Cheng, X.; Warren, S.T. Fragile X syndrome due to a missense mutation. *Eur J Hum Genet* **2014**, *22*, 1185-1189, doi:10.1038/ejhg.2013.311.
16. De Boulle, K.; Verkerk, A.J.; Reyniers, E.; Vits, L.; Hendrickx, J.; Van Roy, B.; Van den Bos, F.; de Graaff, E.; Oostra, B.A.; Willems, P.J. A point mutation in the FMR-1 gene associated with fragile X mental retardation. *Nat Genet* **1993**, *3*, 31-35, doi:10.1038/ng0193-31.
17. Feng, Y.; Absher, D.; Eberhart, D.E.; Brown, V.; Malter, H.E.; Warren, S.T. FMRP associates with polyribosomes as an mRNP, and the I304N mutation of severe fragile X syndrome abolishes this association. *Mol Cell* **1997**, *1*, 109-118, doi:10.1016/s1097-2765(00)80012-x.
18. Carroll, R.; Shaw, M.; Arvio, M.; Gardner, A.; Kumar, R.; Hodgson, B.; Heron, S.; McKenzie, F.; Järvelä, I.; Gecz, J. Two novel intragenic variants in the FMR1 gene in patients with suspect clinical diagnosis of Fragile X syndrome and no CGG repeat expansion. *Eur J Med Genet* **2020**, *63*, 104010, doi:10.1016/j.ejmg.2020.104010.
19. Zeidler, S.; Severijnen, L.A.; de Boer, H.; van der Toorn, E.C.; Ruivenkamp, C.A.L.; Bijlsma, E.K.; Willemsen, R. A missense variant in the nuclear export signal of the FMR1 gene causes intellectual disability. *Gene* **2021**, *768*, 145298, doi:10.1016/j.gene.2020.145298.
20. Handt, M.; Epplen, A.; Hoffjan, S.; Mese, K.; Epplen, J.T.; Dekomien, G. Point mutation frequency in the FMR1 gene as revealed by fragile X syndrome screening. *Mol Cell Probes* **2014**, *28*, 279-283, doi:10.1016/j.mcp.2014.08.003.
21. Park, K.M.; Jun, K.R.; Lee, H.J.; Park, S.; Kim, S.E. Unilateral diffuse white matter involvement in a patient with atypical FMR1 mutation. *Clin Neurol Neurosurg* **2020**, *197*, 106182, doi:10.1016/j.clineuro.2020.106182.
22. Okray, Z.; de Esch, C.E.; Van Esch, H.; Devriendt, K.; Claeys, A.; Yan, J.; Verbeeck, J.; Froyen, G.; Willemsen, R.; de Vrij, F.M.; et al. A novel fragile X syndrome mutation reveals a conserved role for the carboxy-terminus in FMRP localization and function. *EMBO Mol Med* **2015**, *7*, 423-437, doi:10.15252/emmm.201404576.

23. Hu, H.; Haas, S.A.; Chelly, J.; Van Esch, H.; Raynaud, M.; de Brouwer, A.P.; Weinert, S.; Froyen, G.; Frints, S.G.; Laumonnier, F.; et al. X-exome sequencing of 405 unresolved families identifies seven novel intellectual disability genes. *Mol Psychiatry* **2016**, *21*, 133-148, doi:10.1038/mp.2014.193.
24. Wang, Y.C.; Lin, M.L.; Lin, S.J.; Li, Y.C.; Li, S.Y. Novel point mutation within intron 10 of FMR-1 gene causing fragile X syndrome. *Hum Mutat* **1997**, *10*, 393-399, doi:10.1002/(sici)1098-1004(1997)10:5<393::Aid-humu10>3.0.Co;2-v.
