# Supplementary material for: Beyond Trinucleotide Repeat Expansion in Fragile X Syndrome: Rare Coding and Noncoding Variants in FMR1 and Associated Phenotypes
Source: MDPI journal article supplement (doi:10.3390/genes12111669), 2021-10-22
Supplement: s1 [file s1]

**Supplementary Table S1.** Additional details of CGG repeat testing in probands and information used to apply pathogenicity criteria for variants in Table 1.

| Ref.   | Location                                                    |                                                     |                  | # affected with variant, sex | CGG repeats      | Other variants in proband | Inheritance/originating allele                                                                                  | Segregation | FMR1 expression in patient                    | Ascertainment              | ACMG criteria                | Conclusion  |
|--------|-------------------------------------------------------------|-----------------------------------------------------|------------------|------------------------------|------------------|---------------------------|-----------------------------------------------------------------------------------------------------------------|-------------|-----------------------------------------------|----------------------------|------------------------------|-------------|
|        | Proximal                                                    | Distal                                              | Type             |                              |                  |                           |                                                                                                                 |             |                                               |                            |                              |             |
| [1]    | >140198205 (DXS1232-DXS105), <7 Mb upstream                 | <148215436 (between 141R-DXS533), 264 kb downstream | Del              | 1M                           | Absent           |                           | Maternal (unaffected), origin de novo in mother (both grandparents lack deletion with normal CGG repeat counts) |             |                                               | ID, obesity                | CNV 2A 5G_0.1                | PATH (1.1)  |
| [2]    | >140784366 (CDR1-sWXD2905), <7 Mb upstream                  | <148203554 (DXS7847); >DXS8318, <252 kb downstream  | Del              | 1M + mother                  | Absent           |                           | Maternal (mildly affected)                                                                                      |             |                                               | DD, clinical suspicion     | CNV 2A 5G_0.1                | PATH (1.1)  |
| [3] #3 | 142254456, 5.7 Mb upstream                                  | 148191426, 240 kb downstream                        | Del het          | 1F                           | ?                |                           | De novo                                                                                                         |             |                                               | Epilepsy research database | CNV 2A 5A_0.15               | PATH (1.15) |
| [4]    | 147158490, 753 kb upstream                                  | 148171882, 221 kb downstream                        | Mosaic del (90%) | 1M                           | 23 (weak signal) |                           | Occurred on 23-repeat allele (mother has 23, 30-repeat alleles); breakpoints are LINE1 elements                 |             |                                               | ID                         | CNV 2A 5A_0.15               | PATH (1.15) |
| [5]    | 147630212-147721930 (DXS532-DXS548), 200-300 kb upstream    | Intragenic, ~30kb downstream of HTF island          | Del              | 1M                           | no fragile site  |                           | De novo                                                                                                         |             |                                               | ID, facies, testicle size  | SVI PVS1_Str ong PS2 PM2     | PATH        |
| [6]    | 147653688, 260 kb upstream                                  | 147955394, 4 kb downstream                          | Del              | 1M                           |                  |                           | Mosaic in mother (3/400 lymphocytes) & same deletion in subsequent pregnancy                                    |             |                                               | Clinical FXS               | CNV 2A 5G_0.1                | PATH (1.1)  |
| [7]    | >147722126 (DXS548); >DXS477, <cosmid 494; <190 kb upstream | 147932685-147932763, exon 9                         | Del              | 1M                           | Absent           |                           | ? (mother "borderline intelligence")                                                                            |             |                                               | ID                         | SVI PVS1_Str ong PM2         | LPATH       |
| [8] #2 | >147722126 (DXS548); >G9L, <FRAXAC1; <190 kb upstream       | 147936614-147937465, intron 10                      | Del              | 1M                           | no fragile site  |                           | De novo on 19-repeat allele (mother 19, 51 repeats)                                                             |             | mRNA absent (lymphoblastoid cell line RT-PCR) | ID, clinical FXS           | SVI PVS1_Str ong PS2 PS3 PM2 | PATH        |

|                |                                                                             |                                                                                           |                     |                        |                    |                                                                                                       |                                                                                                                                                                                             |                                                             |                                               |
|----------------|-----------------------------------------------------------------------------|-------------------------------------------------------------------------------------------|---------------------|------------------------|--------------------|-------------------------------------------------------------------------------------------------------|---------------------------------------------------------------------------------------------------------------------------------------------------------------------------------------------|-------------------------------------------------------------|-----------------------------------------------|
| [9]            | <147722126<br>(includes DXS548),<br>not mapped further;<br>>190 kb upstream | ?, includes<br><i>FMR1</i>                                                                | Del                 | 1M + infant<br>brother | Absent             | Mat germline mosaicism (2<br>brothers, absent in mother) (mother<br>has congenital digit amputations) | DD                                                                                                                                                                                          | CNV 2A<br>5G_0.1                                            | PATH<br>(1.1)                                 |
| [10]<br>#18072 | 147787231, 125 kb<br>upstream                                               | 148041310, 90 kb<br>downstream                                                            | Del                 | 2M                     |                    | Maternal (unaffected het)                                                                             | Present in<br>both affected<br>brothers in<br>this family                                                                                                                                   | Autism<br>cohort                                            | CNV 2A<br>5G_0.1<br>PATH<br>(1.1)             |
| [11] #3        | 147838064, 74 kb<br>upstream                                                | 148103912, 400<br>kb downstream                                                           | Del                 | 1M                     | no PCR<br>product  | De novo                                                                                               |                                                                                                                                                                                             | Clinical<br>lab<br>sample                                   | CNV 2A<br>5A_0.15<br>PATH<br>(1.15)           |
| [12]           | 15-80 kb upstream<br>(G9L YAC)                                              | 147930245-<br>147932424,<br>intron 7                                                      | Del                 | 1M                     | Absent             | De novo (both maternal alleles<br>normal repeat length)                                               | FMRP absent<br>(lymphoblastoi<br>d cell line)                                                                                                                                               | DD                                                          | SVI<br>PVS1_Str<br>ong PS2<br>PS3 PM2<br>PATH |
| [13], [14]     | 4.4 kb upstream                                                             | 194 kb<br>downstream                                                                      | Del                 | 1M                     | Absent             | Maternal (unaffected mosaic);<br>breakpoints are within L1MC2 and<br>MIR3 elements                    |                                                                                                                                                                                             | Preschool<br>cohort<br>with ID<br>and >=1<br>FXS<br>feature | CNV 2A<br>5G_0.1<br>PATH<br>(1.1)             |
| [15] #24       | 147910365, 1.5 kb<br>upstream                                               | 147912050<br>(within CGG<br>repeat, no AGG<br>interspersions in<br>remaining<br>sequence) | Del                 | 4M, 2F                 | ~45                | Maternal (unaffected)                                                                                 | Males: 4<br>affected/4<br>hemizygotes<br>(#14, 15, 23,<br>24) and 0<br>affected/4<br>noncarriers<br>(#5, 13, 18,<br>19); Females:<br>2 affected/7<br>het and 0<br>affected/3<br>noncarriers | Speech<br>delay,<br>hyperacti<br>vity                       | CNV<br>2C2_0.3<br>5D_0.3<br>VUS (0.6)         |
| [8] #1         | 147911457, 462 bp<br>upstream of<br>transcription start                     | 147912135, c.-45<br>(including entire<br>CGG repeat)                                      | Mosaic<br>del (40%) | 1M                     | no fragile<br>site | De novo                                                                                               |                                                                                                                                                                                             | Epilepsy,<br>other<br>clinical                              | CNV<br>2C2_0.3<br>5A_0.15<br>VUS<br>(0.45)    |

|      |                                                  |                                              |         |         |        |                                                                  |                                                                                                           |                                         |                                                   |                                |                                            |
|------|--------------------------------------------------|----------------------------------------------|---------|---------|--------|------------------------------------------------------------------|-----------------------------------------------------------------------------------------------------------|-----------------------------------------|---------------------------------------------------|--------------------------------|--------------------------------------------|
| [16] | ~147911751 (~300 bp upstream of CGG)             | ? (~400 bp size deletion)                    | Del     | 1M      | Absent | 13p+ polymorphism (karyotype), father "mentally slow"            | De novo (mother is FXS full mutation 700-900 repeat het, unaffected with 95% skewed XCI toward nl allele) |                                         | ID, aggressive behavior                           | CNV 2C2_0 5A_0.15              | VUS (0.15)                                 |
| [17] | 147911831, 88 bp upstream of transcription start | 147912185, c.6                               | Del     | 1M      |        |                                                                  |                                                                                                           | FMRP absent (lymphoblastoid cell line)  | ID male with >=2 FXS features                     | SVI PVS1_Moderate PS3 PM2      | LPATH                                      |
| [18] | 147911966, c.-214                                | Within CGG repeats, 19 remaining (no AGGs)   | Del     | N/A (M) |        |                                                                  | Maternal (unaffected mosaic, het for 430-530 CGG full mutation); del on full mutation allele by haplotype |                                         | Unaffected, prenatal testing                      | CNV 2C2_0 5A_0                 | VUS (0)                                    |
| [19] | 147911981, c.-199                                | 147912050 (within CGG repeats, 9 remaining)  | Del het | N/A     |        |                                                                  | Transmitted from unaffected female proband to male fetus                                                  |                                         | Unaffected individual, population screening study | CNV 2C2_0 5F_0                 | VUS (0)                                    |
| [20] | 147911984, c.-196                                | 147912140, c.-40 (distal to CGG repeat)      | Del het | N/A (F) | Absent | Large deletion involving FMR1 <i>in trans</i> (46,X,del[X](q24)) | De novo, from maternal full mutation allele                                                               | FMRP present (lymphoblastoid)           | Asymptomatic; due to brother with FXS             | CNV 2C2_0 5A_-0.3              | VUS (-0.3) with additional benign evidence |
| [21] | 147912024, c.-156                                | 147912111, c.-69 (1 bp distal to CGG repeat) | Del     | N/A (M) |        |                                                                  | De novo, from maternal full mutation allele                                                               | mRNA level normal (whole blood qRT-PCR) | Asymptomatic; due to maternal full mutation       | CNV 2C2_0 5A_-0.3 (unaffected) | VUS (-0.3) with additional benign evidence |

|                                                                                                          |                                                    |                                  |         |              |   |                                          |                                                                                                                                                                     |                                        |                             |
|----------------------------------------------------------------------------------------------------------|----------------------------------------------------|----------------------------------|---------|--------------|---|------------------------------------------|---------------------------------------------------------------------------------------------------------------------------------------------------------------------|----------------------------------------|-----------------------------|
|                                                                                                          |                                                    |                                  |         |              |   |                                          | Normal mRNA quantity but retained intron 16 sequence (1 brother) and 44 aa truncation of FMRP with 50% reduced level (2 brothers) (blood, lymphoblastoid cell line) | SVI PVS1_Moderate PS3_Moderate PM2 PP1 | LPATH                       |
| [22] APN26, [23] #1                                                                                      | <147948682 (Deletion of exon 17)                   | >147964837 (Deletion of exon 17) | Del     | 3M           |   | Maternal (unaffected)                    | Present in 3 affected brothers                                                                                                                                      | ID sequencing cohort                   |                             |
| [19]                                                                                                     | Undetermined 5' UTR                                | Loss of exon 1                   | Del     | 1 male fetus |   | Mother is full mutation (280 repeat) het |                                                                                                                                                                     | Population screening study             | SVI PVS1_Strong PS3         |
| [24] #3660                                                                                               | Intragenic (~197 bp flanking CGG repeat in exon 1) | Intragenic                       | Del     | 1M           |   |                                          | ?, FHx mild ID mother, psychiatric problems mother, 2 mat uncles with ID (no genotypes)                                                                             | ID cohort                              | CNV 2C2(0) 5G_0.1 VUS (0.1) |
| Potentially including <i>AFF2</i> (additional reports of confirmed <i>FMR1-AFF2</i> deletions not shown) |                                                    |                                  |         |              |   |                                          |                                                                                                                                                                     |                                        |                             |
| [11] #4                                                                                                  | 142773651, 5.1 Mb upstream                         | 148673162, 722 kb downstream     | Del het | 1F           |   | De novo                                  |                                                                                                                                                                     | Clinical lab sample                    | CNV 2A 5A_0.15 PATH (1.15)  |
| [3] #2                                                                                                   | 143096757, 4.8 Mb upstream                         | 149186971, 1.2 Mb downstream     | Del het | 1F           | ? | De novo                                  |                                                                                                                                                                     | Epilepsy research database             | CNV 2A 5A_0.15 PATH (1.15)  |
| Duplications                                                                                             |                                                    |                                  |         |              |   |                                          |                                                                                                                                                                     |                                        |                             |
| [11] #1                                                                                                  | 147707513 (204 kb upstream)                        | 148070742 (120 kb downstream)    | Dup het | 1            |   | De novo                                  |                                                                                                                                                                     | clinical testing (lab)                 | CNV 2H_0 VUS (0.6)          |

|         |                             |                               |         |   |    |                                                                                                  |         |                                       |                            |                                     |                            |           |
|---------|-----------------------------|-------------------------------|---------|---|----|--------------------------------------------------------------------------------------------------|---------|---------------------------------------|----------------------------|-------------------------------------|----------------------------|-----------|
|         |                             |                               |         |   |    |                                                                                                  |         |                                       |                            | 4C_0.15x3<br>5A_0.15                |                            |           |
| [11]    | 147709189 (203 kb upstream) | 147976294 (25 kb downstream)  | Dup     | 1 |    |                                                                                                  |         |                                       |                            | clinical testing for seizures (lab) | CNV 2H_0 4C_0.15x3 5A_0.15 | VUS (0.6) |
| [11] #2 | 147796927 (115 kb upstream) | 148144967 (194 kb downstream) | Dup het | 1 |    |                                                                                                  | De novo |                                       |                            | clinical testing (lab)              | CNV 2H_0 4C_0.15x3 5A_0.15 | VUS (0.6) |
| [25]    | 147894723 (17 kb upstream)  | 147979356 (28 kb downstream)  | Dup     | 1 | 29 | hg18: 1q44[245,377,586-245,556,179]x3 (from unaffected father), 4p15.31[22,897,572-23,066,434]x1 | De novo | Normal mRNA level (leukocyte qRT-PCR) | Myoclonic seizures         |                                     | CNV 2H_0 4C_0.15x3 5A_0.15 | VUS (0.6) |
| [26]    | 147912003 (c.-177)          | 147912051 (c.-129)            | Dup     |   |    | N/A (0.2-0.3% X chromosomes in study)                                                            |         | Present in multiple unaffected males  | Finnish population samples |                                     | CNV 2I_0 4O_-1             | BEN (-1)  |

1. Quan, F.; Zonana, J.; Gunter, K.; Peterson, K.L.; Magenis, R.E.; Popovich, B.W. An atypical case of fragile X syndrome caused by a deletion that includes the FMR1 gene. *Am J Hum Genet* **1995**, *56*, 1042-1051.
2. Parvari, R.; Mumm, S.; Galil, A.; Manor, E.; Bar-David, Y.; Carmi, R. Deletion of 8.5 Mb, including the FMR1 gene, in a male with the fragile X syndrome phenotype and overgrowth. *Am J Med Genet* **1999**, *83*, 302-307, doi:10.1002/(sici)1096-8628(19990402)83:4<302::aid-ajmg13>3.0.co;2-p.
3. Myers, K.A.; van 't Hof, F.N.G.; Sadleir, L.G.; Legault, G.; Simard-Tremblay, E.; Amor, D.J.; Scheffer, I.E. Fragile Females: Case Series of Epilepsy in Girls With FMR1 Disruption. *Pediatrics* **2019**, *144*, doi:10.1542/peds.2019-0599.

4. Coffee, B.; Ikeda, M.; Budimirovic, D.B.; Hjelm, L.N.; Kaufmann, W.E.; Warren, S.T. Mosaic FMR1 deletion causes fragile X syndrome and can lead to molecular misdiagnosis: a case report and review of the literature. *Am J Med Genet A* **2008**, *146a*, 1358-1367, doi:10.1002/ajmg.a.32261.
5. Wöhrle, D.; Kotzot, D.; Hirst, M.C.; Manca, A.; Korn, B.; Schmidt, A.; Barbi, G.; Rott, H.D.; Poustka, A.; Davies, K.E.; et al. A microdeletion of less than 250 kb, including the proximal part of the FMR-I gene and the fragile-X site, in a male with the clinical phenotype of fragile-X syndrome. *Am J Hum Genet* **1992**, *51*, 299-306.
6. Jiraanont, P.; Hagerman, R.J.; Neri, G.; Zollino, M.; Murdolo, M.; Tassone, F. Germinal mosaicism for a deletion of the FMR1 gene leading to fragile X syndrome. *Eur J Med Genet* **2016**, *59*, 459-462, doi:10.1016/j.ejmg.2016.08.009.
7. Trottier, Y.; Imbert, G.; Poustka, A.; Fryns, J.P.; Mandel, J.L. Male with typical fragile X phenotype is deleted for part of the FMR1 gene and for about 100 kb of upstream region. *Am J Med Genet* **1994**, *51*, 454-457, doi:10.1002/ajmg.1320510431.
8. Hirst, M.; Grewal, P.; Flannery, A.; Slatter, R.; Maher, E.; Barton, D.; Fryns, J.P.; Davies, K. Two new cases of FMR1 deletion associated with mental impairment. *Am J Hum Genet* **1995**, *56*, 67-74.
9. Prior, T.W.; Papp, A.C.; Snyder, P.J.; Sedra, M.S.; Guida, M.; Enrile, B.G. Germline mosaicism at the fragile X locus. *Am J Med Genet* **1995**, *55*, 384-386, doi:10.1002/ajmg.1320550327.
10. Griswold, A.J.; Ma, D.; Cukier, H.N.; Nations, L.D.; Schmidt, M.A.; Chung, R.H.; Jaworski, J.M.; Salyakina, D.; Konidari, I.; Whitehead, P.L.; et al. Evaluation of copy number variations reveals novel candidate genes in autism spectrum disorder-associated pathways. *Hum Mol Genet* **2012**, *21*, 3513-3523, doi:10.1093/hmg/dds164.
11. Nagamani, S.C.; Erez, A.; Probst, F.J.; Bader, P.; Evans, P.; Baker, L.A.; Fang, P.; Bertin, T.; Hixson, P.; Stankiewicz, P.; et al. Small genomic rearrangements involving FMR1 support the importance of its gene dosage for normal neurocognitive function. *Neurogenetics* **2012**, *13*, 333-339, doi:10.1007/s10048-012-0340-y.
12. Gu, Y.; Lugenbeel, K.A.; Vockley, J.G.; Grody, W.W.; Nelson, D.L. A de novo deletion in FMR1 in a patient with developmental delay. *Hum Mol Genet* **1994**, *3*, 1705-1706, doi:10.1093/hmg/3.9.1705.
13. Luo, S.; Huang, W.; Xia, Q.; Du, Q.; Wu, L.; Duan, R. Mutational analyses of the FMR1 gene in Chinese pediatric population of fragile x suspects: low tolerance for point mutation. *J Child Neurol* **2015**, *30*, 803-806, doi:10.1177/0883073814538508.
14. Luo, S.; Huang, W.; Xia, Q.; Xia, Y.; Du, Q.; Wu, L.; Duan, R. Cryptic FMR1 mosaic deletion in a phenotypically normal mother of a boy with fragile X syndrome: case report. *BMC Med Genet* **2014**, *15*, 125, doi:10.1186/s12881-014-0125-2.
15. Meijer, H.; de Graaff, E.; Merckx, D.M.; Jongbloed, R.J.; de Die-Smulders, C.E.; Engelen, J.J.; Fryns, J.P.; Curfs, P.M.; Oostra, B.A. A deletion of 1.6 kb proximal to the CGG repeat of the FMR1 gene causes the clinical phenotype of the fragile X syndrome. *Hum Mol Genet* **1994**, *3*, 615-620, doi:10.1093/hmg/3.4.615.
16. Hammond, L.S.; Macias, M.M.; Tarleton, J.C.; Shashidhar Pai, G. Fragile X syndrome and deletions in FMR1: new case and review of the literature. *Am J Med Genet* **1997**, *72*, 430-434.

17. Collins, S.C.; Coffee, B.; Benke, P.J.; Berry-Kravis, E.; Gilbert, F.; Oostra, B.; Halley, D.; Zwick, M.E.; Cutler, D.J.; Warren, S.T. Array-based FMR1 sequencing and deletion analysis in patients with a fragile X syndrome-like phenotype. *PLoS One* **2010**, *5*, e9476, doi:10.1371/journal.pone.0009476.
18. Tabolacci, E.; Pietrobono, R.; Maneri, G.; Remondini, L.; Nobile, V.; Della Monica, M.; Pomponi, M.G.; Genuardi, M.; Neri, G.; Chiurazzi, P. Reversion to Normal of FMR1 Expanded Alleles: A Rare Event in Two Independent Fragile X Syndrome Families. *Genes (Basel)* **2020**, *11*, doi:10.3390/genes11030248.
19. Hung, C.C.; Lee, C.N.; Wang, Y.C.; Chen, C.L.; Lin, T.K.; Su, Y.N.; Lin, M.W.; Kang, J.; Tai, Y.Y.; Hsu, W.W.; et al. Fragile X syndrome carrier screening in pregnant women in Chinese Han population. *Sci Rep* **2019**, *9*, 15456, doi:10.1038/s41598-019-51726-4.
20. Grønskov, K.; Hjalgrim, H.; Bjerager, M.O.; Brøndum-Nielsen, K. Deletion of all CGG repeats plus flanking sequences in FMR1 does not abolish gene expression. *Am J Hum Genet* **1997**, *61*, 961-967, doi:10.1086/514872.
21. Erbs, E.; Fenger-Grøn, J.; Jacobsen, C.M.; Lildballe, D.L.; Rasmussen, M. Spontaneous rescue of a FMR1 repeat expansion and review of deletions in the FMR1 non-coding region. *Eur J Med Genet* **2021**, *64*, 104244, doi:10.1016/j.ejmg.2021.104244.
22. Redin, C.; Gérard, B.; Lauer, J.; Herenger, Y.; Muller, J.; Quartier, A.; Masurel-Paulet, A.; Willems, M.; Lesca, G.; El-Chehadeh, S.; et al. Efficient strategy for the molecular diagnosis of intellectual disability using targeted high-throughput sequencing. *J Med Genet* **2014**, *51*, 724-736, doi:10.1136/jmedgenet-2014-102554.
23. Quartier, A.; Poquet, H.; Gilbert-Dussardier, B.; Rossi, M.; Casteleyn, A.S.; Portes, V.D.; Feger, C.; Nourisson, E.; Kuentz, P.; Redin, C.; et al. Intragenic FMR1 disease-causing variants: a significant mutational mechanism leading to Fragile-X syndrome. *Eur J Hum Genet* **2017**, *25*, 423-431, doi:10.1038/ejhg.2016.204.
24. Viveiros, M.T.; Santos, M.D.; Dos Santos, J.M.; Viveiros, D.M.; Cavalcante, M.R.; Caldas, A.J.; Pimentel, M.M. Screening for fragile X syndrome in males from specialized institutions in the northeast region of Brazil. *Genet Mol Res* **2015**, *14*, 6897-6905, doi:10.4238/2015.June.18.32.
25. Vengoechea, J.; Parikh, A.S.; Zhang, S.; Tassone, F. De novo microduplication of the FMR1 gene in a patient with developmental delay, epilepsy and hyperactivity. *Eur J Hum Genet* **2012**, *20*, 1197-1200, doi:10.1038/ejhg.2012.78.
26. Mononen, T.; von Koskull, H.; Airaksinen, R.L.; Juvonen, V. A novel duplication in the FMR1 gene: implications for molecular analysis in fragile X syndrome and repeat instability. *Clin Genet* **2007**, *72*, 528-531, doi:10.1111/j.1399-0004.2007.00903.x.
